# Supplementary material for: Exploring suitable oligoamines for phantom ring-closing condensation polymerization with guanidine hydrochloride
Source: Royal Society of Chemistry journal article supplement (doi:10.1039/c2py20672b), 2012-10-02
Supplement: c2py20672b.pdf [file c2py20672b.pdf]

## Supplementary Information

### Exploring Suitable Oligoamines for Phantom Ring-Closing Condensation Polymerization with Guanidine Hydrochloride

Claudia Mattheis, Hui Wang, Martin C. Schwarzer, Gernot Frenking,\* Seema Agarwal\*

Structures of model compound ensembles used for geometry optimizations.

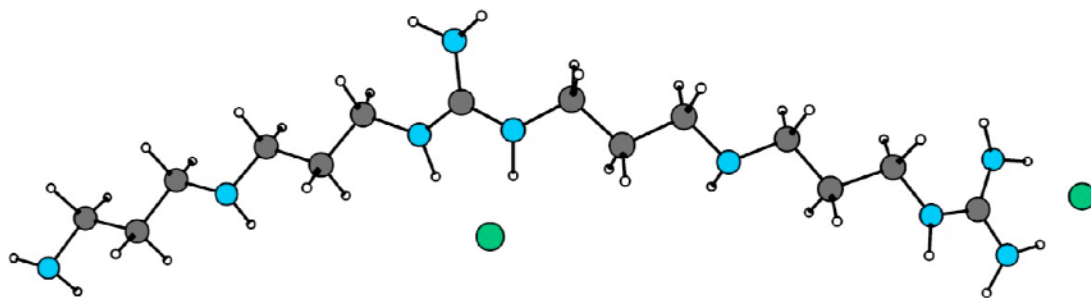

**Figure S1.** Model compound 1.1.

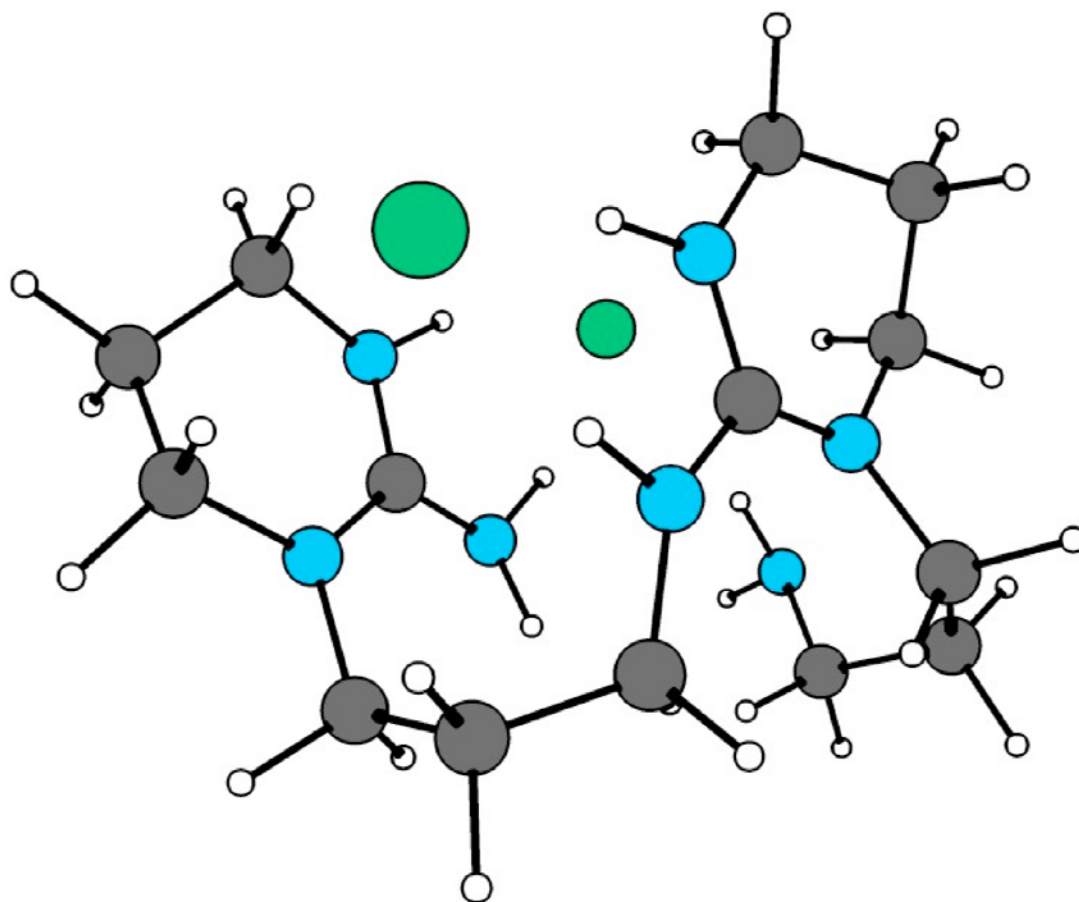

**Figure S2.** Model compound 1.2.

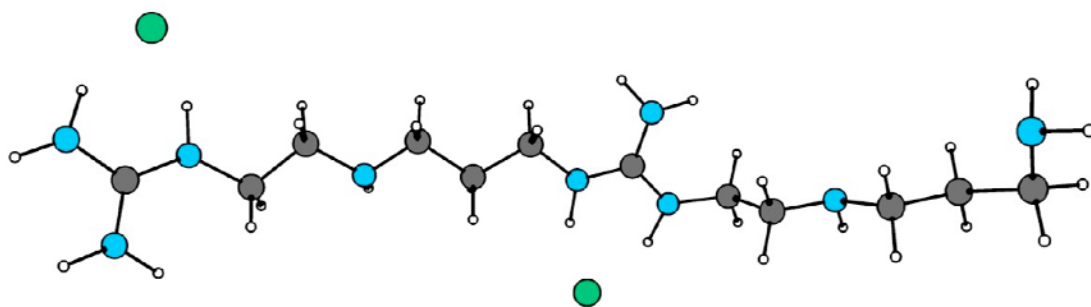

**Figure S3.** Model compound 2.1.

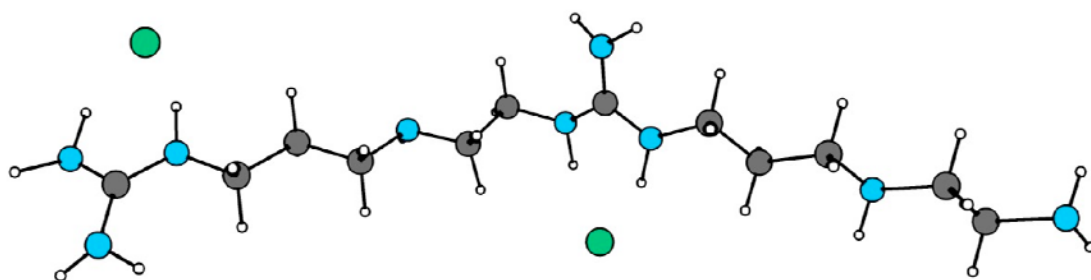

**Figure S4.** Model compound 2.2.

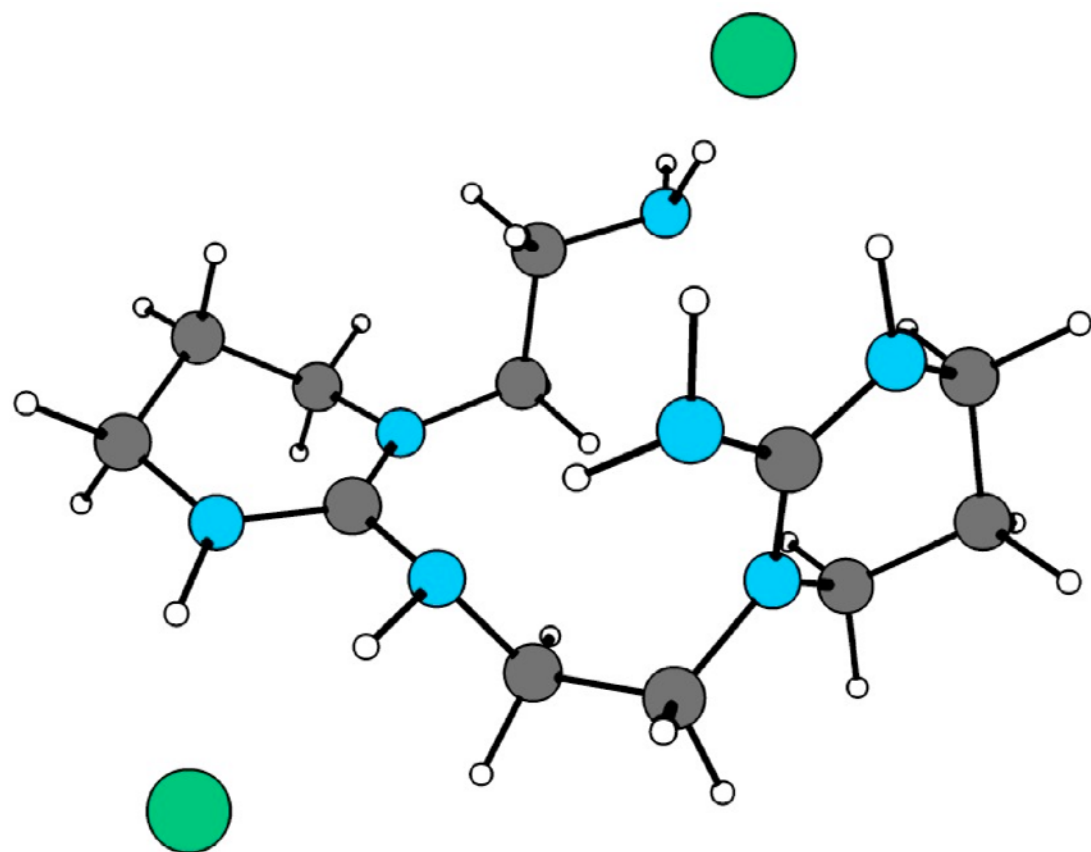

**Figure S5.** Model compound 2.4.
